# Supplementary material for: Atomic-level interface engineering enables efficient and durable acidic hydrogen evolution of osmium at large current densities
Source: Royal Society of Chemistry journal article supplement (doi:10.1039/d5sc09741j), 2026-01-01
Supplement: d5sc09741j1.pdf [file d5sc09741j1.pdf]

**Atomic-level interface engineering enables efficient and durable acidic  
hydrogen evolution of osmium under large current densities**

Qianyi Lin, Jun Yu,\* Mansheng Liao, Weidong Liang, Yayun Hong, Huiqi Li,  
Zhongxin Song, and Lei Zhang\*

*College of Chemistry and Environmental Engineering, Shenzhen University, Shenzhen  
518071, China. E-mail: yujun@szu.edu.cn; lei.zhang@szu.edu.cn*

## Experiment Section:

**Materials:** All chemicals, including Osmium(IV) chloride ( $\text{K}_2\text{OsCl}_6$ , 38.7%, Macklin), cerium(III) hexahydrate ( $\text{Ce}(\text{NO}_3)_3 \cdot 6\text{H}_2\text{O}$ , 99%, Macklin), HCl (36-38%, Shenzhen Boleen Technology Co., Ltd.), absolute alcohol (98%, Aladdin), Millipore water ( $0.07 \mu\text{S cm}^{-1}$ ), and Carbon paper (CP) (TGPH060, Toray), were used without further purification.

**Synthesis of  $\text{Os}_{\text{SA}}\text{-CeO}_2$ ,  $\text{Os}_{\text{NP}}/\text{CeO}_2$ , and  $\text{Os}_{\text{NP}}$  samples:**  $\text{CeO}_2$  support: carbon paper ( $2 \times 2 \text{ cm}$ ) was ultrasonically cleaned in deionized water (10 min), HCl (90 min), and ethanol (10 min). The  $\text{CeO}_2$  plating solution was prepared by dissolving  $\text{Ce}(\text{NO}_3)_3 \cdot 6\text{H}_2\text{O}$  (0.88 g, 2 mM) and NaCl (0.59 g, 10 mM) in deionized water (1 L). A 50 mL aliquot was used in a PTFE cell with carbon paper (working electrode), graphite rod (counter), and Ag/AgCl (reference). Electrodeposition was performed at 1 mA for 900 s while the plating cell was placed in a  $70^\circ\text{C}$  hot-water bath. The obtained films were calcined at  $500^\circ\text{C}$  ( $5^\circ\text{C} \cdot \text{min}^{-1}$ ) for 2 h. Os single-atom incorporation: the obtained  $\text{CeO}_2$ /carbon paper was cut into  $1 \times 2 \text{ cm}$  pieces, and a  $1 \times 1 \text{ cm}$  working area was defined using sealing film. Prior to deposition, the electrode was activated at  $-100 \text{ mA} \cdot \text{cm}^{-2}$  for 20 min. For Os incorporation,  $962 \mu\text{L}$  of  $1 \text{ mg} \cdot \text{mL}^{-1} \text{K}_2\text{OsCl}_6$  was added to 40 mL of 0.5 M  $\text{K}_2\text{SO}_4$ . Electrodeposition was conducted using  $\text{CeO}_2$ /carbon paper as the working electrode, a carbon rod counter electrode, and an RHE reference. Specifically, cyclic voltammetry (CV) was applied for 50 cycles within a potential window of 0 to  $-0.4 \text{ V}$  vs. RHE, corresponding to a total deposition time of approximately 13 minutes. For  $\text{Os}_{\text{NP}}/\text{CeO}_2$  and  $\text{Os}_{\text{NP}}$  samples, the Os deposition process is identical to that used for  $\text{Os}_{\text{SA}}\text{-CeO}_2$ . The substrates employed are  $\text{CeO}_2$  annealed in Ar ( $\text{CeO}_2\text{-Ar}$ ) for  $\text{Os}_{\text{NP}}/\text{CeO}_2$  and carbon paper for  $\text{Os}_{\text{NP}}$ , respectively.

**Structural characterization:** The morphologies of the prepared samples were examined using field-emission scanning electron microscopy (FESEM, JSM-7800F) and transmission electron microscopy (TEM, JEM-F200). High-resolution structural characterization, single-atom identification, and elemental mapping were performed using a spherical aberration-corrected TEM (Thermo Fisher Spectra 200). The crystal

phases were analyzed by X-ray diffraction (XRD, Empyrean). The surface chemical states were determined by X-ray photoelectron spectroscopy (XPS, Thermo Scientific Nexsa). In situ Fourier-transform infrared (FTIR) spectroscopy was carried out using a CHI 760e electrochemical workstation (Shanghai, China) equipped with a three-electrode system. The sample served as the working electrode, Hg/HgO as the reference electrode, and a carbon rod as the counter electrode. This setup was used to monitor variations in the hydrogen-bond network strength during the cathodic hydrogen evolution reaction (HER) in water electrolysis. Elemental contents were determined by inductively coupled plasma optical emission spectrometry (ICP-OES, Avio 200). X-ray absorption fine structure (XAFS) measurements were conducted at the Os L<sub>3</sub>-edge on beamline BL14W1 at the Shanghai Synchrotron Radiation Facility (SSRF, Shanghai, China), using Si(111) crystal monochromators. Before analysis, samples were pressed into 1 cm diameter pellets and sealed with Kapton tape. The spectra were collected in fluorescence mode at room temperature using a four-channel silicon drift detector (SDD, Bruker 5040). Negligible variations in line shape or peak position were observed between repeated scans for a given sample. The spectra were processed and analyzed using the Athena and Artemis software packages.

**Electrochemical measurements:** Electrochemical measurements were performed at room temperature in 0.5 M H<sub>2</sub>SO<sub>4</sub> electrolyte using a standard three-electrode configuration, with O<sub>SSA</sub>-CeO<sub>2</sub> as the working electrode, a carbon rod as the counter electrode, and a reversible hydrogen electrode (RHE) as the reference electrode. Linear sweep voltammetry was carried out at a scan rate of 5 mV/s. Electrochemical impedance spectroscopy (EIS) was measured over a frequency range of 10<sup>-1</sup> to 10<sup>5</sup> Hz. The double-layer capacitances (C<sub>dl</sub>) of the samples were evaluated by recording cyclic voltammetry (CV) curves in the non-Faradaic potential region (0.51-0.63 V vs. RHE) at scan rates of 0.02, 0.04, 0.06, 0.08, and 0.10 mV/s. Tafel plots were obtained using a scan rate of 1 mV/s. All tests were conducted under stagnant electrolyte conditions.

**TOF:** Turnover frequency (TOF) was calculated as the following equation:

$$TOF = \frac{j \times A}{2 \times F \times n}$$

$j$  is the measured current density at given overpotential.  $A$  is the area of the electrode.  $F$  is the Faraday constant (96485 C/mol).  $n$  is the number of all metal atoms that are coated onto the electrode, and the specific content is obtained by ICP.

**DFT calculations:** First-principles DFT calculations were performed using the projector-augmented wave method and the Perdew–Burke–Ernzerhof exchange-correlation functional as implemented in the Vienna Ab Initio Simulation Package (VASP).<sup>1-4</sup> The  $2\sqrt{3} \times 3$  supercell with twelve atomic layers was constructed to simulate the (111) and Os-doped (111) CeO<sub>2</sub> surfaces, the atoms of the middle four layers were fixed, and the rest were allowed to relax. A vacuum distance of 18Å was found to be adequate. The cut-off energy for plane wave was set to 520 eV after a series of test, and the convergence criterion for the residual force and energy was set to 0.02 eV Å<sup>-1</sup> and 10<sup>-4</sup> eV, respectively. The empirical correction in Grimme's method (DFT+D3) was used to describe the van der Waals (vdW) interactions.<sup>5</sup> To understand the role of  $f$  electrons in determining the rare-earth oxide band gaps, the models were explored using DFT+U with an effective U-J term of 6.0 and 5.0 eV and for Os and Ce elements.<sup>6</sup> The Brillouin region was sampled by the Monkhorst-Pack method with a 3×3×1 k-point mesh.<sup>7</sup> Here, differences in Gibbs free energies ( $\Delta G$ ) for intermediates on catalysts surface involved in the acid hydrogen evolution process were calculated by using the computational hydrogen electrode model,

$$\Delta G = \Delta E + \Delta E_{ZPE} - T\Delta S + \Delta G_U$$

where the reaction energy ( $\Delta E$ ) can be directly obtained by analyzing the DFT total energies. The zero-point energy difference ( $\Delta E_{ZPE}$ ) between the products and the reactants can be computed from the vibrational frequencies.

$\Delta S = S(H^*) - 1/2 \cdot S(H_2)$  is the change in entropy between the products (H<sub>2</sub>) and the reactants (H\*) at room temperature (T=298.15 K), and the latter is approximately zero.

$\Delta G_U = -eU$ , whereby  $U$  is the electrode potential. All the structures discussed in this study were rendered by VESTA.<sup>8</sup>



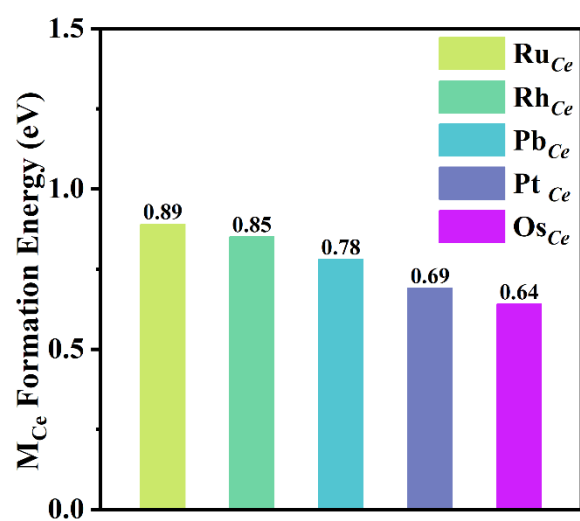

**Fig. S1** Calculated formation energies of  $M_{Ce}$  (M stands for the substituted atom for Ce).

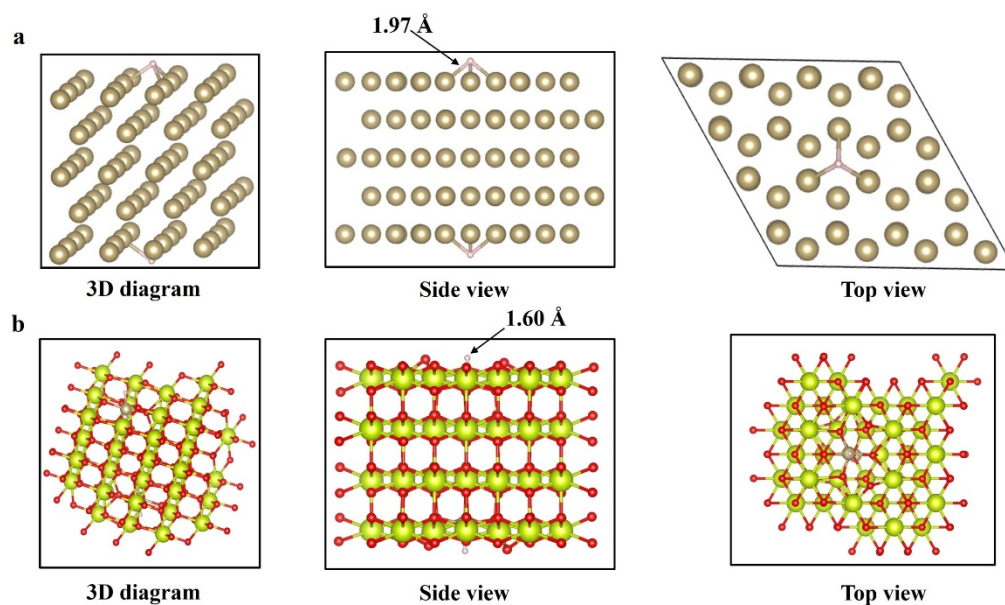

**Fig. S2** The key HER intermediate of  $\text{H}^*$  adsorbed on Os site of a)  $\text{Os}_{\text{NP}}$  and b)  $\text{Os}_{\text{SA}}\text{-CeO}_2$ . The silver, yellow and red spheres represent Os, Ce and H atoms, respectively.

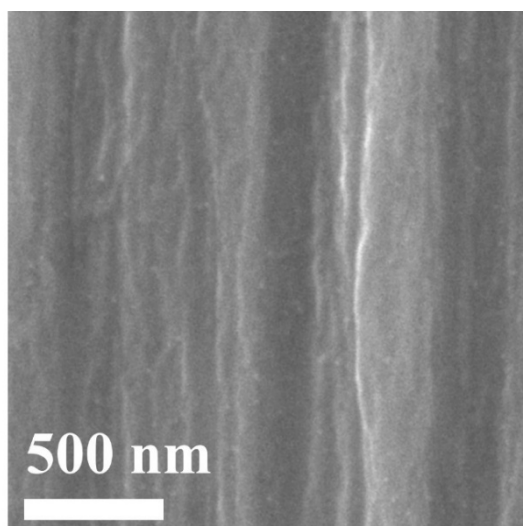

**Fig. S3** SEM image of CeO<sub>2</sub>.



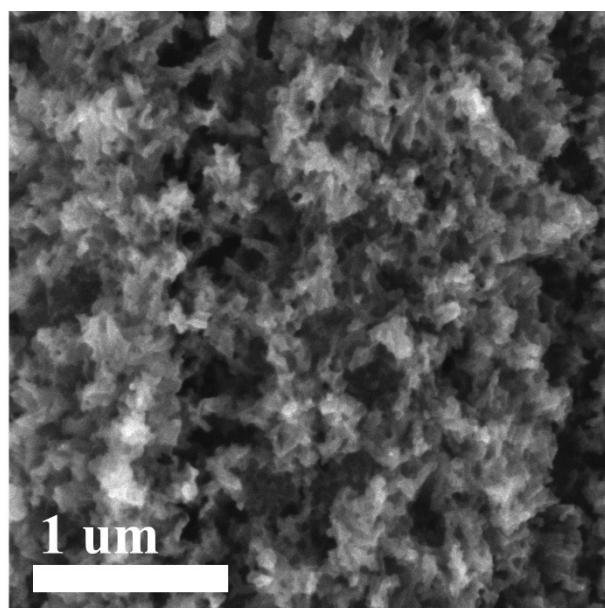

**Fig. S4** SEM image of CeO<sub>2</sub>-O<sub>2</sub>.

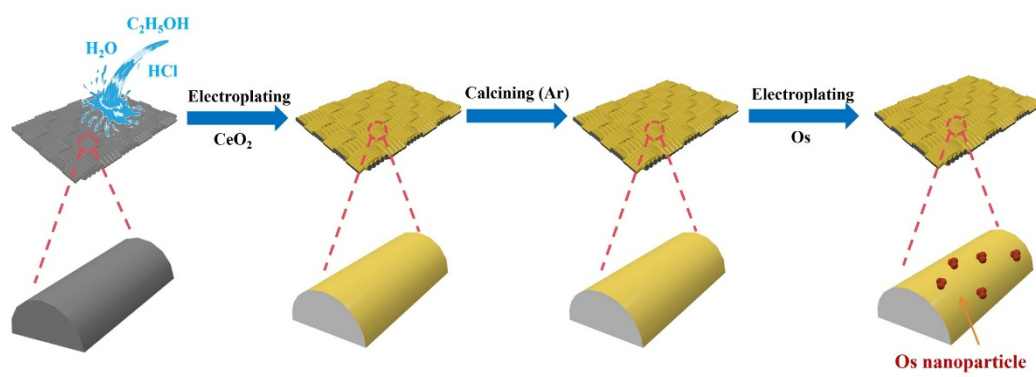

**Fig. S5** Schematic illustration of the synthesis route for  $\text{Os}_{\text{NP}}/\text{CeO}_2$ .

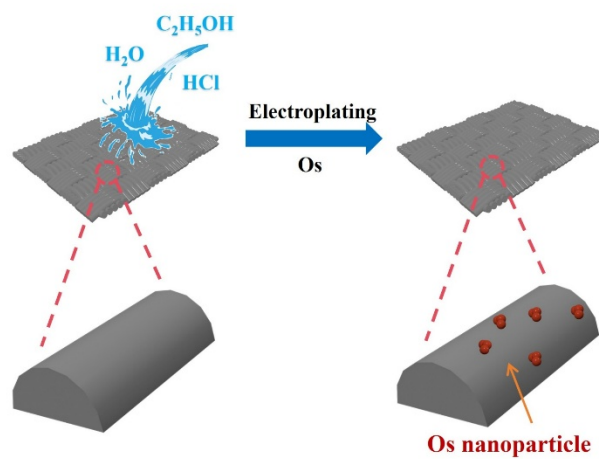

**Fig. S6** Schematic illustration of the synthesis route for Os<sub>NP</sub>.

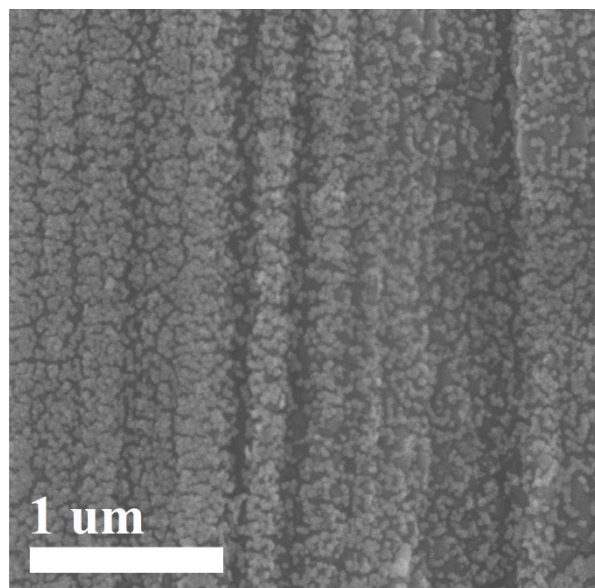

**Fig. S7** SEM image of CeO<sub>2</sub>-Ar.

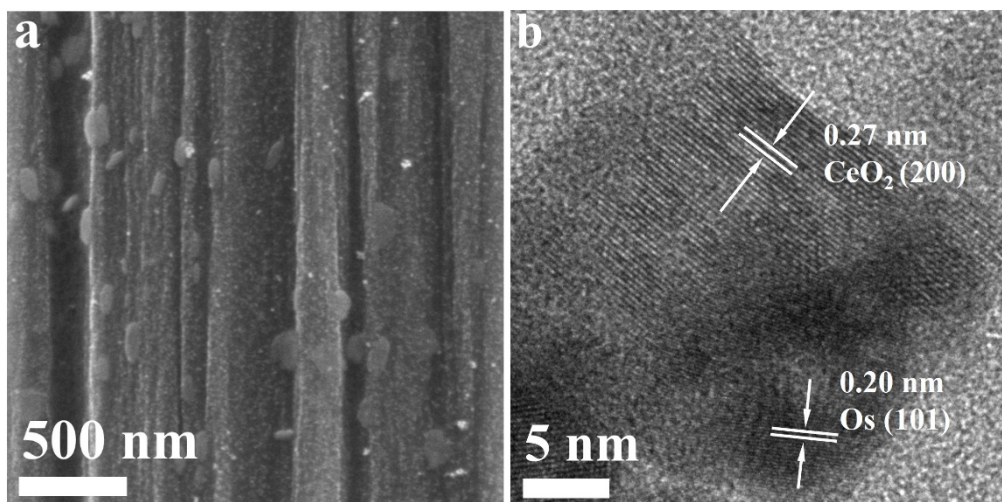

**Fig. S8** (a) SEM image and (b) TEM image of Os<sub>NP</sub>/CeO<sub>2</sub>.

Abundant nanoparticles are observed in the SEM image of Os<sub>NP</sub>/CeO<sub>2</sub> (Fig. S8a), and TEM analysis (Fig. S8b) further confirms that these particles are metallic Os.

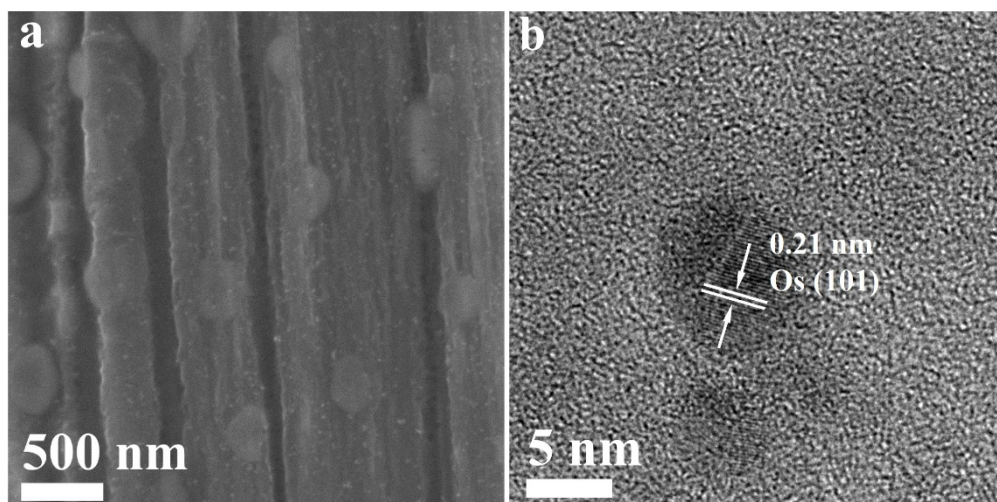

**Fig. S9** (a) SEM image and (b) TEM image of Os<sub>NP</sub>.

Abundant nanoparticles are observed in the SEM image of Os<sub>NP</sub> (Fig. S9a), and TEM analysis (Fig. S9b) further confirms that these particles are metallic Os.

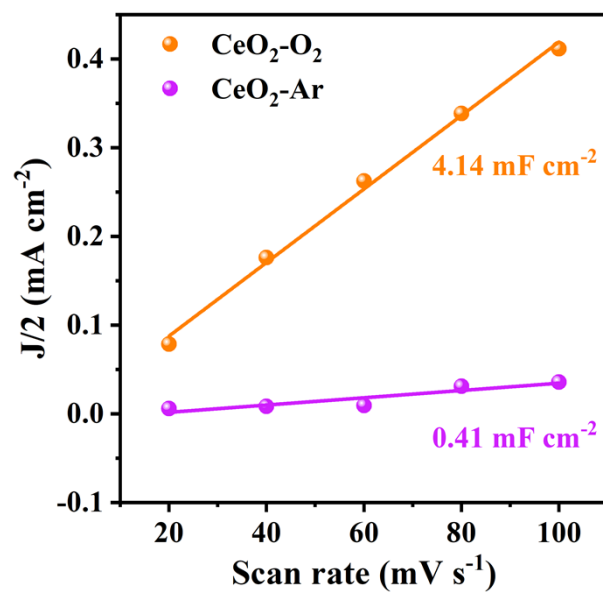

**Fig. S10** Electrochemical active surface area (ECSA) of CeO<sub>2</sub>-O<sub>2</sub> and CeO<sub>2</sub>-Ar.

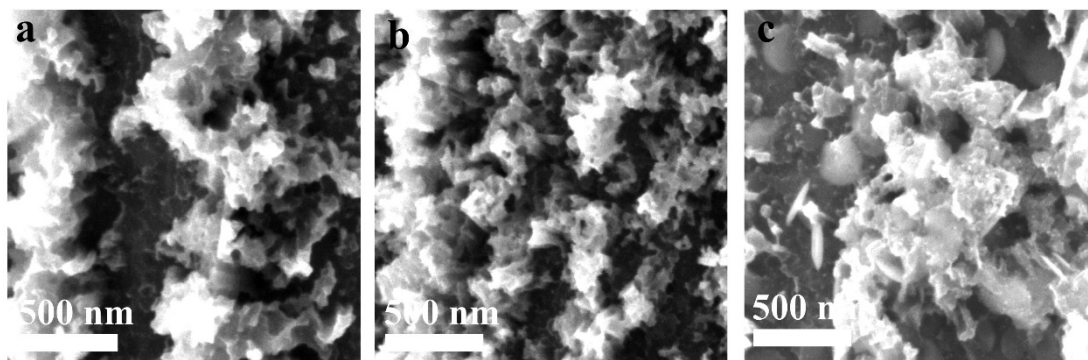

**Fig. S11** SEM images of (a) Os-10 CV, (b) Os-50 CV (Os<sub>SA</sub>-CeO<sub>2</sub>), and (c) Os-90 CV.

To tune the amount of Os deposited on porous CeO<sub>2</sub>, different numbers of CV scan cycles were applied during the electrodeposition process. As shown in Fig. S11, the morphology of the sample with 10 CV scans (Os-10 CV) is very similar to that of the Os<sub>SA</sub>-CeO<sub>2</sub> sample prepared with 50 CV scans. However, when the number of CV scans increases to 90 (Os-90 CV), a large number of nanoparticles are formed.



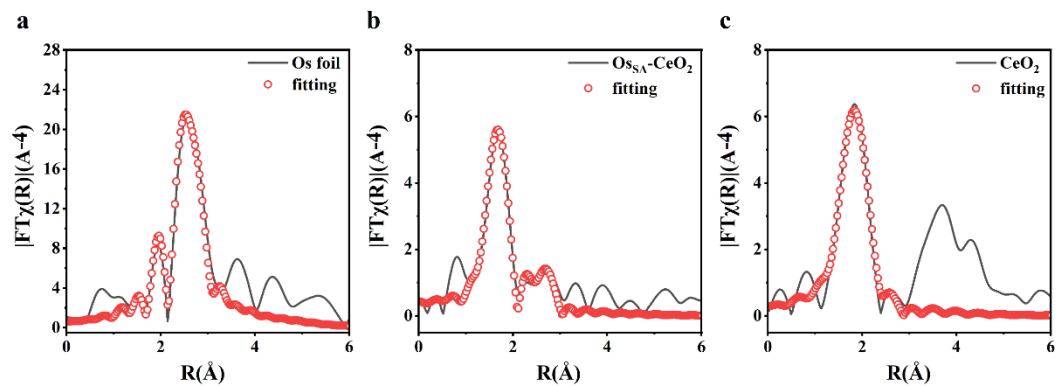

**Fig. S12** Fourier transform (FT) EXAFS fitting of Os in a) Os foil and b)  $\text{Os}_{\text{SA}}\text{-CeO}_2$ . c) FT EXAFS fitting of Ce in  $\text{CeO}_2$ .

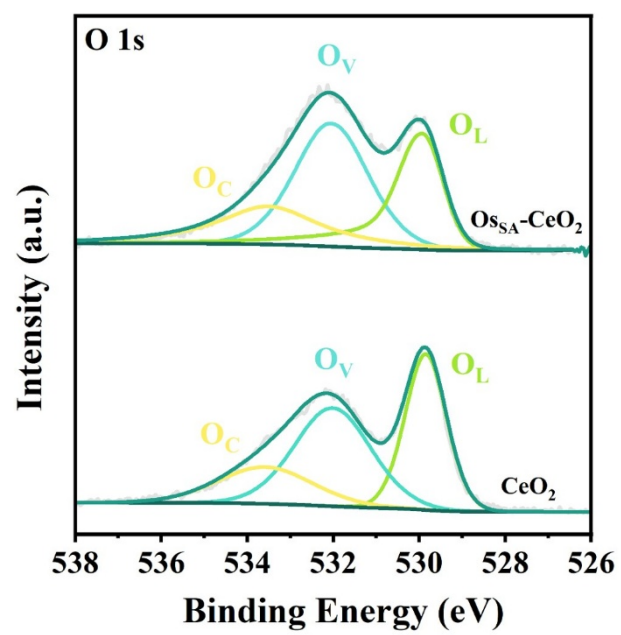

**Fig. S13** High-resolution XPS spectra of O 1s.

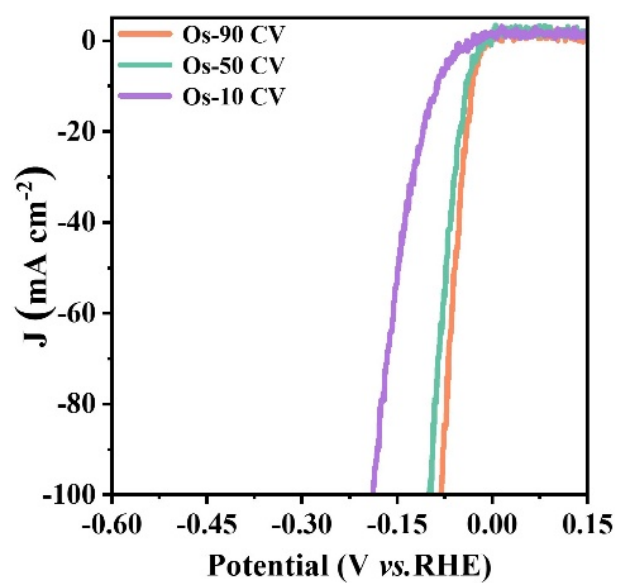

**Fig. S14** HER polarization curves of Os-10 CV, Os-50 CV ( $\text{Os}_{\text{SA}}\text{-CeO}_2$ ) and Os-90 CV.

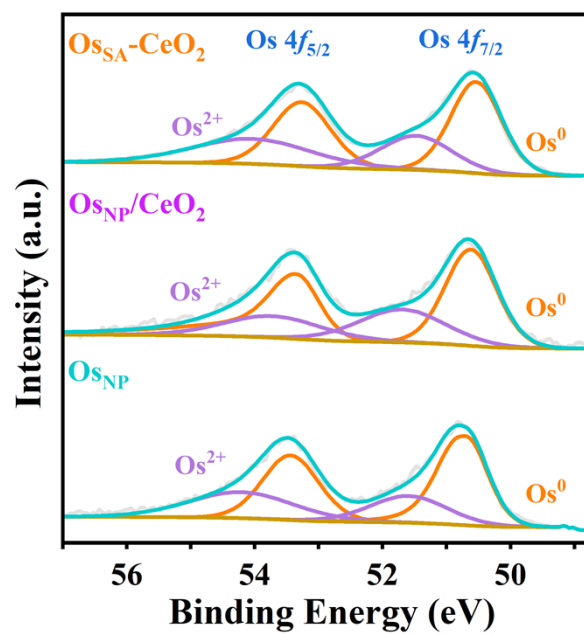

**Fig. S15** High-resolution XPS spectra of  $\text{Os}_{\text{SA}}\text{-CeO}_2$ ,  $\text{Os}_{\text{NP}}/\text{CeO}_2$  and  $\text{Os}_{\text{NP}}$  after HER reaction.

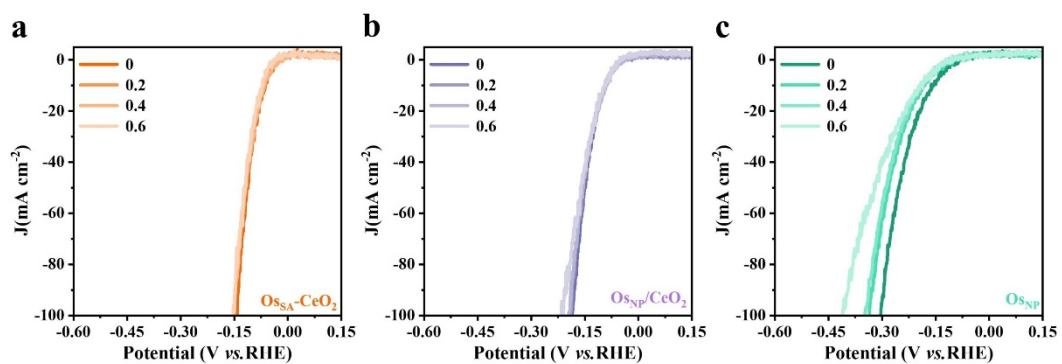

**Fig. S16** LSV curves of a) Os<sub>SA</sub>-CeO<sub>2</sub>, b) Os<sub>NP</sub>/CeO<sub>2</sub> and c) Os<sub>NP</sub> under different pH conditions.

**Table S1.** Contents of Os and Ce in Os<sub>SA</sub>-CeO<sub>2</sub> determined from HAADF-STEM.

| Element | Content (%) |
|---------|-------------|
| Os      | 0.09        |
| Ce      | 0.32        |

**Table S2.** EXAFS fitting parameters at the  $L_3$ -edge of Ce and Os.

| Sample             | Shell | $CN^a$  | $R(\text{\AA})^b$ | $\sigma^2(\text{\AA}^2)^c$ | $\Delta E_0(\text{eV})^d$ | $R$ factor |
|--------------------|-------|---------|-------------------|----------------------------|---------------------------|------------|
| CeO <sub>2</sub>   | Ce-O  | 7.7±1.0 | 2.27±0.01         | 0.01                       | 6.2                       | 0.0198     |
| Os foil            | Os-Os | 12      | 2.70±0.01         | 0.0044                     | 9.2                       | 0.0114     |
| OsO <sub>2</sub>   | Os-O  | 4       | 1.66±0.01         | 0.0078                     | 14                        | 0.0174     |
| Os <sub>SA</sub> - | Os-O  | 3.2±0.2 | 1.72±0.01         | 0.0065                     | 14.3                      | 0.0194     |
| CeO <sub>2</sub>   | Os-Ce | 1.0±0.3 | 2.83±0.01         | 0.008                      | 6.8                       |            |

**Table S3.** The EIS fitting results of catalysts at 0 V vs. RHE.

| Catalyst        | $R_{CT} \Omega$ | Error % |
|-----------------|-----------------|---------|
| $OS_{SA}-CeO_2$ | 1.6             | 0.4     |
| $OS_{NP}/CeO_2$ | 23.5            | 1.4     |
| $OS_{NP}$       | 51.4            | 1.5     |



**Table S4.** Contents of Os in Os<sub>SA</sub>-CeO<sub>2</sub>, Os<sub>NP</sub>/CeO<sub>2</sub> and Os<sub>NP</sub> determined from ICP.

| Catalyst                 | Os <sub>SA</sub> -CeO <sub>2</sub> | Os <sub>NP</sub> /CeO <sub>2</sub> | Os <sub>NP</sub> |
|--------------------------|------------------------------------|------------------------------------|------------------|
| Os (μg/cm <sup>2</sup> ) | 7.925                              | 0.775                              | 2.325            |

**Table S5.** Proportions of different interfacial water species at various potentials obtained from in situ FTIR spectroscopy.

| Potential (V) | 4-HB-H <sub>2</sub> O (%) | 2-HB-H <sub>2</sub> O (%) | free-H <sub>2</sub> O (%) |
|---------------|---------------------------|---------------------------|---------------------------|
| -0.4          | 34.82                     | 59.14                     | 6.04                      |
| -0.5          | 33.84                     | 58.17                     | 7.99                      |
| -0.55         | 30.84                     | 59.29                     | 9.87                      |
| -0.60         | 27.59                     | 62.23                     | 10.18                     |

## References

1. Kresse, G. and Furthmüller, J., *Comput. Mater. Sci.*, 1996, **6**, 15–50.
2. Kresse, G. and Furthmüller, J., *Phys. Rev. B*, 1996, **54**, 11169–11186.
3. Perdew, J. P., Burke, K. and Ernzerhof, M., *Phys. Rev. Lett.*, 1996, **77**, 3865–3868.
4. Kresse, G. and Joubert, D., *Phys. Rev. B*, 1999, **59**, 1758–1775.
5. Grimme, S., Antony, J., Ehrlich, S. and Krieg, H., *J. Chem. Phys.*, 2010, **132**, 154104.
6. Cococcioni, M. and de Gironcoli, S., *Phys. Rev. B*, 2005, **71**, 035105.
7. Monkhorst, H. J. and Pack, J. D., *Phys. Rev. B*, 1976, **13**, 5188–5192.
8. Momma, K. and Izumi, F., *J. Appl. Crystallogr.*, 2011, **44**, 1272–1276.
